# Supplementary material for: Photoinduced micelle-to-vesicle transition and encapsulation of glucose by photoresponsive Malachite Green leuconitrile derivative
Source: Royal Society of Chemistry journal article supplement (doi:10.1039/b716640k), 2008-01-01
Supplement: b716640k.pdf [file b716640k.pdf]

# **Photoinduced Micelle-to-Vesicle Transition and Enhancement of Encapsulation by Photoresponsive Malachite Green Leuconitrile Derivative**

Ryoko M. Uda,<sup>a</sup> Tomoyuki Tanabe,<sup>a</sup> Yoshio Nakahara<sup>b</sup> and Keiichi Kimura\*<sup>b</sup>

<sup>a</sup> Department of Chemical Engineering, Nara National College of Technology, Yata 22, Yamato-koriyama, Nara 639-1080, Japan.

<sup>b</sup> Department of Applied Chemistry, Faculty of Systems Engineering, Wakayama University, Sakae-dani 930, Wakayama 640-8510, Japan.

Emails

ryoko@chem.nara-k.ac.jp

kkimura@sys.wakayama-u.ac.jp

Transmission electron micrograph of the sample at the [1]/[AOT] ratio = 0.131

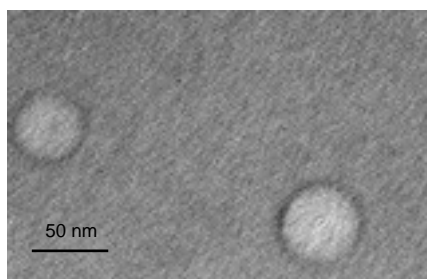

**Fig.** Negative staining electron micrograph of vesicles formed in the UV-irradiated mixture of AOT and **1**. [AOT] =  $9.56 \times 10^{-3}$  mol dm<sup>-3</sup>; [**1**] =  $1.26 \times 10^{-3}$  mol dm<sup>-3</sup>.
